# Supplementary material
Source: publisher figshare collection journal article supplement (https://acs.figshare.com/ndownloader/files/4559893)
Supplement: Supplementary file 1 [file 4559893]

# Unusual transformation of mechanically induced monodomain state to polydomain one in polar nematic liquid crystals of aromatic polyesters

*Yoshiaki Taguchi,<sup>†,‡</sup> Chu-Chun Yen,<sup>†,§</sup> Sungmin Kang,<sup>†</sup> Masatoshi Tokita<sup>†</sup> and Junji Watanabe<sup>\*†</sup>*

Department of Organic and Polymeric Materials, Tokyo Institute of Technology, Ookayama, Meguro-ku, Tokyo 152-8552, Japan

Research and Develop Center, Polyplastics Co., Ltd., 973, Miyajima, Fuji, Shizuoka 416-8533, Japan

Department of Materials Science, Fudan University, 220 Handan Road, Shanghai 200433, P. R. China

\*Corresponding Author. e-mail: [jwatanab@polymer.titech.ac.jp](mailto:jwatanab@polymer.titech.ac.jp)

<sup>†</sup> Tokyo Institute of Technology

<sup>‡</sup> Polyplastics Co., Ltd.

<sup>§</sup> Fudan University

## Figure Captions

Figure S1. Steady-state viscosity for the nematic LCs of (a) **Poly-A** and (b) **Poly-C** at 330 °C. The data presented by closed and open circles are collected by the plate-and-plate rheometer and the capillary rheometer, respectively.

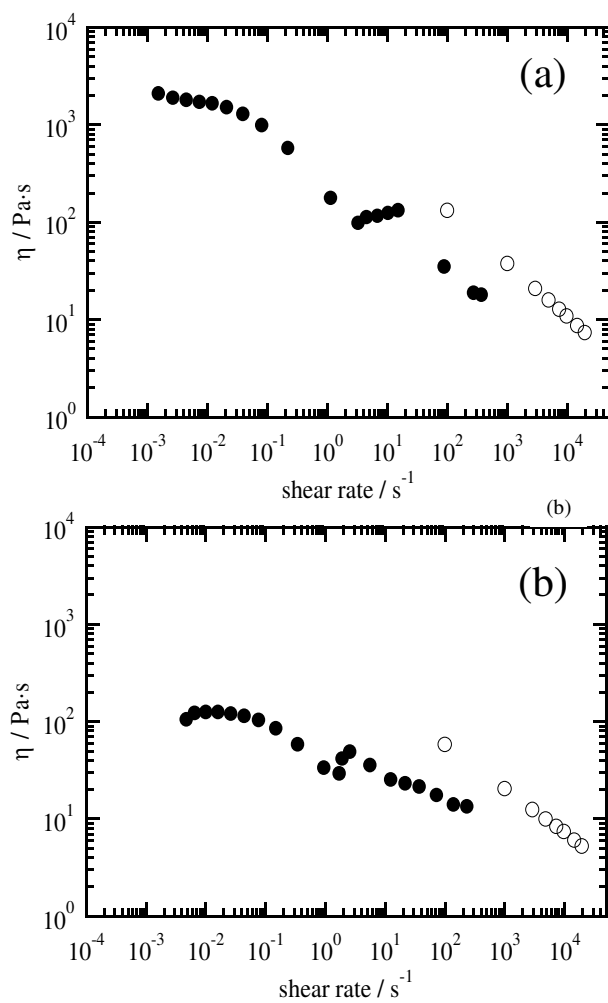

Figure S1
